# Supplementary material for: Mannheimia haemolytica in Feedlot Cattle: Prevalence of Recovery and Associations with Antimicrobial Use, Resistance, and Health Outcomes
Source: PubMed Central journal article supplement — J Vet Intern Med. 2015 Mar 27;29(2):705–13. doi: 10.1111/jvim.12547 (PMC4895489; doi:10.1111/jvim.12547), 2015-03-27
Supplement: JVIM-29-705-s001.pdf [file JVIM-29-705-s001.pdf]

**Supplemental Table 1. Interpretive criteria (minimum inhibitory concentrations [ug/ml]) for *Mannheimia haemolytica* susceptibility testing using broth microdilution**

| Antimicrobial                 | Susceptible | Intermediate | Resistant | Reference                   |
|-------------------------------|-------------|--------------|-----------|-----------------------------|
| Amikacin                      | ≤16         | 32           | ≥64       | *CLSI M100-S22, 2012        |
| Ampicillin                    | ≤0.5        | -            | -         | CLSI M45-A2, 2010           |
| Amoxicillin-Clavulanic acid   | ≤0.5/0.25   | -            | -         | CLSI M45-A2, 2010           |
| Cefoxitin                     | ≤8          | 16           | ≥32       | *CLSI M100-S22, 2012        |
| Ceftiofur                     | ≤2          | 4            | ≥8        | CSLI M31-A4, 2013           |
| Ceftriaxone                   | ≤1          | 2            | ≥4        | *CLSI M100-S22, 2012        |
| Chloramphenicol               | ≤8          | 16           | ≥32       | *CLSI M100-S22, 2012        |
| Ciprofloxacin                 | ≤1          | 2            | ≥4        | *CLSI M100-S21, 2011        |
| Gentamicin                    | ≤4          | 8            | ≥16       | *CLSI M100-S22, 2012        |
| Kanamycin                     | ≤16         | 32           | ≥64       | *CLSI M100-S22, 2012        |
| Nalidixic Acid                | ≤16         | -            | ≥32       | *CLSI M100-S22, 2012        |
| Streptomycin                  | ≤32         | -            | ≥64       | NARMS Executive Report 2009 |
| Sulfisoxazole                 | ≤256        | -            | ≥512      | *CLSI M100-S22, 2012        |
| Tetracycline                  | ≤2          | 4            | ≥8        | CLSI M31-A4, 2013           |
| Trimethoprim-Sulfamethoxazole | ≤0.5/9.5    | -            | -         | CLSI M45-A2, 2010           |

\* Interpretive criteria for *E. coli* used in lieu of *M. haemolytica* since CLSI does not define breakpoints for *M. haemolytica* and these antimicrobial drugs. CLSI = Clinical and Laboratory Standards Institute.

**Supplemental Table 2. Interpretive criteria (inhibition zone diameters [mm]) for *Mannheimia haemolytica* susceptibility testing using disk diffusion**

| <b>Antimicrobial</b>          | <b>[Disk] (µg)</b> | <b>Susceptible</b> | <b>Intermediate</b> | <b>Resistant</b> | <b>Reference</b>   |
|-------------------------------|--------------------|--------------------|---------------------|------------------|--------------------|
| Ampicillin                    | 10                 | ≥27                | -                   | -                | CLSI M45-A2, 2010  |
| Amoxicillin-Clavulanic acid   | 20/10              | ≥27                | -                   | -                | CLSI M45-A2, 2010  |
| Ceftiofur                     | 30                 | ≥21                | 18-20               | ≤17              | CLSI M31-A3, 2008  |
| Danofloxacin                  | 5                  | ≥22                | -                   | -                | CLSI M31-A3, 2008  |
| Enrofloxacin                  | 5                  | ≥21                | 17-20               | ≤16              | CLSI M31-A4, 2013  |
| Florfenicol                   | 30                 | ≥19                | 15-18               | ≤14              | CLSI M31-A4, 2013  |
| Gentamicin                    | 10                 | ≥15                | -                   | ≤12              | Catry et al., 2007 |
| Spectinomycin                 | 100                | ≥14                | 11-13               | ≤10              | CLSI M31-A3, 2008  |
| Sulfisoxazole                 | 300                | ≥17                | 13-16               | ≤12              | CLSI M31-A3, 2008  |
| Tetracycline                  | 30                 | ≥23                | -                   | -                | CLSI M45-A2, 2010  |
| Tilmicosin                    | 15                 | ≥14                | 11-13               | ≤10              | CLSI M31-A4, 2013  |
| Trimethoprim-Sulfamethoxazole | 1.25/23.75         | ≥24                | -                   | -                | CLSI M45-A2, 2010  |
| Tulathromycin                 | 30                 | ≥18                | 15-17               | ≤14              | CLSI M31-A4, 2013  |

CLSI = Clinical and Laboratory Standards Institute.

**Supplemental Table 3. Minimum inhibitory concentrations for *Mannheimia haemolytica* isolates recovered from deep nasopharyngeal swabs obtained from feedlot cattle (n=2,833 isolates)**

| MIC <sup>a</sup><br>(µg/ml) | Amikacin     | <sup>b</sup> Amoxicillin-<br>Clavulanate | Ampicillin   | Cefoxitin   | Ceftiofur    | Ceftiozone   | Chloramphenicol | Ciprofloxacin | Gentamicin   | Kanamycin    | Nalidixic Acid | Streptomycin | Sulfonamide  | Tetracycline | <sup>c</sup> Trimethoprim-<br>Sulfamethoxazole |
|-----------------------------|--------------|------------------------------------------|--------------|-------------|--------------|--------------|-----------------|---------------|--------------|--------------|----------------|--------------|--------------|--------------|------------------------------------------------|
| <b>0.016</b>                |              |                                          |              |             |              |              |                 | 2804 (99.0%)  |              |              |                |              |              |              |                                                |
| <b>0.031</b>                |              |                                          |              |             |              |              |                 | 23 (0.8%)     |              |              |                |              |              |              |                                                |
| <b>0.063</b>                |              |                                          |              |             |              |              |                 | 3 (0.1%)      |              |              |                |              |              |              |                                                |
| <b>0.125</b>                |              |                                          |              |             | 2781 (98.2%) |              |                 | 0 (0%)        |              |              |                |              |              |              | 2820 (99.5%)                                   |
| <b>0.25</b>                 |              |                                          |              |             | 21 (0.7%)    | 2805 (99.0%) |                 | 2 (0.1%)      | 30 (1.1%)    |              |                |              |              |              | 1 (0.04%)                                      |
| <b>0.5</b>                  | 30 (1.1%)    |                                          |              | 2493 (88%)  | 11 (0.4%)    | 16 (0.6%)    |                 | 1 (0.04%)     | 6 (0.2%)     |              | 105 (3.7%)     |              |              |              | 4 (0.1%)                                       |
| <b>1</b>                    | 2 (0.1%)     | 2824 (99.7%)                             | 2800 (98.8%) | 318 (11.2%) | 8 (0.3%)     | 9 (0.3%)     |                 | 0 (0%)        | 216 (7.6%)   |              | 1600 (56.5%)   |              |              |              | 3 (0.1%)                                       |
| <b>2</b>                    | 5 (0.2%)     | 6 (0.2%)                                 | 6 (0.2%)     | 7 (0.2%)    | 6 (0.2%)     | 2 (0.1%)     | 2823 (99.6%)    |               | 2449 (86.4%) |              | 1113 (39.3%)   |              |              |              | 0 (0%)                                         |
| <b>4</b>                    | 32 (1.1%)    | 0 (0%)                                   | 1 (0.04%)    | 9 (0.3%)    | 4 (0.1%)     | 0 (0%)       | 9 (0.3%)        |               | 132 (4.7%)   |              | 10 (0.4%)      |              |              | 2755 (97.2%) | 5 (0.2%)                                       |
| <b>8</b>                    | 1753 (61.9%) | 0 (0%)                                   | 3 (0.1%)     | 1 (0.04%)   | 1 (0.04%)    | 0 (0%)       | 1 (0.04%)       |               | 0 (0%)       | 2535 (89.5%) | 0 (0%)         |              |              | 16 (0.6%)    | 0 (0%)                                         |
| <b>16</b>                   | 995 (35.1%)  | 0 (0%)                                   | 5 (0.2%)     | 0 (0%)      | 1 (0.04%)    | 0 (0%)       | 0 (0%)          |               |              | 189 (6.7%)   | 1 (0%)         |              | 1771 (62.5%) | 13 (0.5%)    |                                                |
| <b>32</b>                   | 13 (0.5%)    | 0 (0%)                                   | 13 (0.5%)    | 3 (0.1%)    |              |              |                 |               |              | 1 (0.04%)    | 1 (0%)         | 2714 (95.8%) | 451 (15.9%)  | 47 (1.7%)    |                                                |
| <b>64</b>                   | 3 (0.1%)     | 3 (0.1%)                                 | 5 (0.2%)     | 2 (0.1%)    |              |              |                 |               |              | 108 (3.8%)   | 3 (0.1%)       | 12 (0.4%)    | 423 (14.9%)  | 2 (0.1%)     |                                                |
| <b>128</b>                  | 0 (0%)       |                                          |              |             |              |              |                 |               |              |              |                | 107 (3.8%)   | 88 (3.1%)    |              |                                                |
| <b>256</b>                  |              |                                          |              |             |              |              |                 |               |              |              |                |              | 88 (3.1%)    |              |                                                |
| <b>512</b>                  |              |                                          |              |             |              |              |                 |               |              |              |                |              | 12 (0.4%)    |              |                                                |

<sup>a</sup> Minimum inhibitory concentration obtained from broth microdilution assays; smaller values represent greater susceptibility. Lowest MIC values represent the lowest concentration tested and actual MIC values could be at or below ( $\leq$ ) this value. Highest MIC values represent MIC results that were  $>$  than the 2<sup>nd</sup> highest value, and actual MIC values could be any value greater than the 2<sup>nd</sup> highest value. <sup>b</sup> Values for amoxicillin–clavulanate refer to amoxicillin concentrations (clavulanate was included in wells at half of the amoxicillin concentration). <sup>c</sup> Values for trimethoprim–sulfamethoxazole represent trimethoprim concentrations (sulfamethoxazole was included in wells at 19 times the concentration of trimethoprim).

**Supplemental Table 4. Results of disk diffusion susceptibility testing of *Mannheimia haemolytica* isolates recovered from deep nasopharyngeal swabs obtained from feedlot cattle (n=1,789 isolates)**

| Diameter of Inhibition Zone (mm) <sup>a</sup> | Ampicillin  | Amoxicillin-Clavulanate | Ceftiofur   | Danofoxacin | Enrofloxacin | Florfenicol  | Gentamicin   | Oxytetracycline | Spectinomycin | Tilmicosin   | Trimethoprim-Sulfamethoxazole | Tulathromycin |
|-----------------------------------------------|-------------|-------------------------|-------------|-------------|--------------|--------------|--------------|-----------------|---------------|--------------|-------------------------------|---------------|
| 50 to 55                                      | 0 (0%)      | 0 (0%)                  | 5 (0.3%)    | 0 (0%)      | 1 (0.1%)     | 0 (0%)       | 0 (0%)       | 0 (0%)          | 0 (0%)        | 0 (0%)       | 0 (0%)                        | 0 (0%)        |
| 45 to 50                                      | 3 (0.2%)    | 0 (0%)                  | 44 (2.5%)   | 4 (0.2%)    | 6 (0.3%)     | 0 (0%)       | 0 (0%)       | 0 (0%)          | 0 (0%)        | 0 (0%)       | 0 (0%)                        | 0 (0%)        |
| 40 to 45                                      | 67 (3.7%)   | 40 (2.2%)               | 366 (20.5%) | 48 (2.7%)   | 52 (2.9%)    | 3 (0.2%)     | 0 (0%)       | 0 (0%)          | 0 (0%)        | 0 (0%)       | 26 (1.5%)                     | 0 (0%)        |
| 35 to 40                                      | 524 (29.3%) | 552 (30.9%)             | 777 (43.4%) | 275 (15.4%) | 351 (19.6%)  | 80 (4.5%)    | 0 (0%)       | 8 (0.4%)        | 0 (0%)        | 0 (0%)       | 520 (29.1%)                   | 1 (0.1%)      |
| 30 to 35                                      | 897 (50.1%) | 903 (50.5%)             | 568 (31.7%) | 775 (43.3%) | 907 (50.7%)  | 557 (31.1%)  | 0 (0%)       | 311 (17.4%)     | 35 (2%)       | 2 (0.1%)     | 1016 (56.8%)                  | 66 (3.7%)     |
| 25 to 30                                      | 285 (15.9%) | 292 (16.3%)             | 28 (1.6%)   | 292 (16.3%) | 469 (26.2%)  | 1022 (57.1%) | 150 (8.4%)   | 1301 (72.7%)    | 663 (37.1%)   | 32 (1.8%)    | 218 (12.2%)                   | 881 (49.2%)   |
| 20 to 25                                      | 1 (0.1%)    | 2 (0.1%)                | 1 (0.1%)    | 88 (4.9%)   | 2 (0.1%)     | 125 (7%)     | 1407 (78.6%) | 29 (1.6%)       | 944 (52.8%)   | 1100 (61.5%) | 6 (0.3%)                      | 830 (46.4%)   |
| 15 to 20                                      | 2 (0.1%)    | 0 (0%)                  | 0 (0%)      | 104 (5.8%)  | 0 (0%)       | 0 (0%)       | 232 (13%)    | 22 (1.2%)       | 32 (1.8%)     | 641 (35.8%)  | 1 (0.1%)                      | 9 (0.5%)      |
| 10 to 15                                      | 5 (0.3%)    | 0 (0%)                  | 0 (0%)      | 135 (7.5%)  | 0 (0%)       | 0 (0%)       | 0 (0%)       | 64 (3.6%)       | 29 (1.6%)     | 10 (0.6%)    | 1 (0.1%)                      | 2 (0.1%)      |
| 6 to 10 <sup>b</sup>                          | 5 (0.3%)    | 0 (0%)                  | 0 (0%)      | 68 (3.8%)   | 1 (0.1%)     | 2 (0.1%)     | 0 (0%)       | 54 (3%)         | 86 (4.8%)     | 4 (0.2%)     | 1 (0.1%)                      | 0 (0%)        |

<sup>a</sup> Diameters of zones of inhibition for susceptibility measured with disk diffusion assays; larger values represent greater susceptibility. <sup>b</sup> Disks impregnated with antimicrobial drugs were 6 mm in diameter, which is therefore the minimum possible size of inhibition zones.
